# Supplementary material for: Theoretical hydrogen bonding calculations and proton conduction for Eu(iii)-based metal–organic framework
Source: Royal Society of Chemistry journal article supplement (doi:10.1039/d1ra01528a), 2021-01-01
Supplement: d1ra01528a1.pdf [file d1ra01528a1.pdf]

## Theoretical hydrogen bonding calculations and proton conduction for Eu(III)-based metal-organic framework

Lu Feng,<sup>a</sup> Tian-Yu Zeng,<sup>a</sup> Hao-Bo Hou,<sup>\*a</sup> Hong Zhou<sup>\*b</sup> and Jian Tian<sup>c</sup>

<sup>a</sup> *School of Resource and Environmental Science, Wuhan University, Wuhan 430072, Hubei, China.*

*Corresponding author: [hbb-bhh@163.com](mailto:hbb-bhh@163.com)*

<sup>b</sup> *College of Chemistry and Environmental Technology, Wuhan Institute of Technology, Wuhan 430073, Hubei, China. Corresponding author: [hzhouh@126.com](mailto:hzhouh@126.com)*

<sup>c</sup> *Hangzhou Yanqu Information Technology Co., Ltd., Y2, 2nd Floor, Building 2, Xixi Legu Creative Pioneering Park, No. 712 Wen' er West Road, Xihu District, Hangzhou City, Zhejiang Province, 310003, P.R.O.C.*

## Supporting Information

## Experimental

### 1. Materials

Chemical reagents were purchased commercially and used as received without further purification. The ligand of 1,3,5-triazine-2,4,6-triamine hexaacetic acid (H<sub>6</sub>TTHA) was prepared according to the method reported in literature.<sup>1</sup>

### 2. Physical measurements

Elemental analysis (C, H and N) was performed by using a Perkin-Elmer 2400 series II CHN analyzer. The powder X-ray diffraction measurement was conducted on a Bruker D8 ADVANCE X-ray diffractometer. Infrared (IR) spectrum was recorded in the range 4000 - 400 cm<sup>-1</sup> on a FT-IR analyzer (1601, Shimadzu Co., Japan) by using KBr-pellet method. The water adsorption property of **1** was investigated at 25 °C and in the RH range of 0%-95% by DVS Intrinsic Plus (Surface Measurement Systems, English). Before the measurement, the sample was treated under 0% RH for 6 h until the water molecules in the samples were completely removed.

### 3. Synthesis of the complex $\{[Eu_2(TTHA)(H_2O)_4] \cdot 9H_2O\}_n$ (**1**)

H<sub>6</sub>TTHA (0.04 mmol, 0.0191 g), 4, 4'-bipy (0.12 mmol, 0.019 g), Eu(NO<sub>3</sub>)<sub>3</sub>·6H<sub>2</sub>O (0.04 mmol, 0.0181 g), 2 mL water and 1 mL acetonitrile were added in 10 mL vial. Then, 90 μL 6 mol/L HCl was added. The vial was kept in an autoclave at 140 °C for three days. Colorless crystals were obtained and washed with deionized water. Yield: 63 % (35.41 mg, based on Eu). Anal. Calcd. For C<sub>15</sub>H<sub>38</sub>Eu<sub>2</sub>N<sub>6</sub>O<sub>25</sub>: C, 17.9; H, 3.81; N, 8.35 %. Found: C, 17.54; H, 3.49; N, 8.76 %. Main IR data (KBr, cm<sup>-1</sup>): 3422(m), 3267(m), 2941(w), 1551(s), 1492(m), 1432(w), 1400(m), 1306(s), 1192(m).

### 4. X-ray crystallography

Single-crystal X-ray diffraction data for **1** was collected at 173 K on a Bruker Smart CCD area-detector diffractometer with graphite-monochromatic Mo/Kα radiation (λ = 0.71073 Å) in ω-scan mode. The collected data were reduced using the software package SAINT<sup>2</sup> and semi-empirical absorption correction was applied to the intensity data using SADABS program.<sup>3</sup> The structure of **1** was solved using direct methods, and all nonhydrogen atoms were refined anisotropically by least squares on F<sub>2</sub> using the SHELXTL-2014 program.<sup>4</sup> Hydrogen atoms were placed in calculated positions and refined isotropically using the riding model. Details of the hydrogen-bond geometry, crystallographic data and selected bond lengths (Å) for **1** are summarized in Table S1, Table S2 and Table S3, respectively.

### 5. Proton conductivity studies

Electrical characterization was carried out on a cylindrical pellet (10 mm of diameter and 0.5 mm of thickness) obtained by pressing 50 mg of sample at 500 MPa for 5 min. The pellet was pressed between porous C electrodes (Sigracet, GDL 10 BB, no Pt). Impedance spectroscopy data were collected using a HP4284A impedance analyzer over the frequency range from 20 Hz to 1 MHz with an applied voltage of 0.2 V. Electrical measurements were taken at different temperature (293 - 353 K) and relative humidity (60%, 70%, 80%, 90% and 98%) as well as different times (0h, 4h, 8h and 12h). All measurements were electronically controlled by the winDETA package of programs.<sup>5</sup>

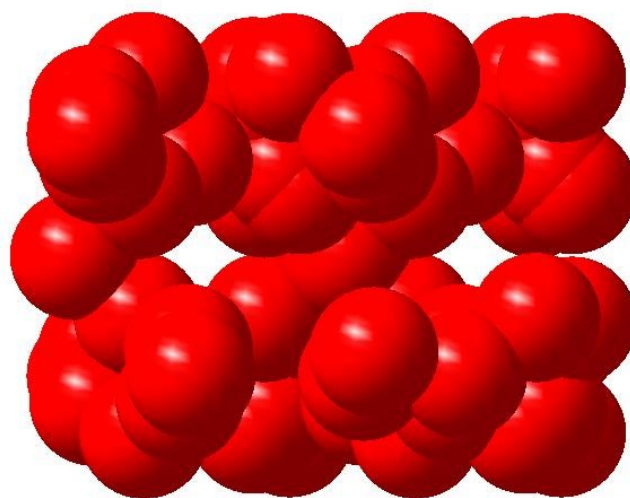

Fig. S1 The space-filling model of water cluster  $((\text{H}_2\text{O})_n)$ .

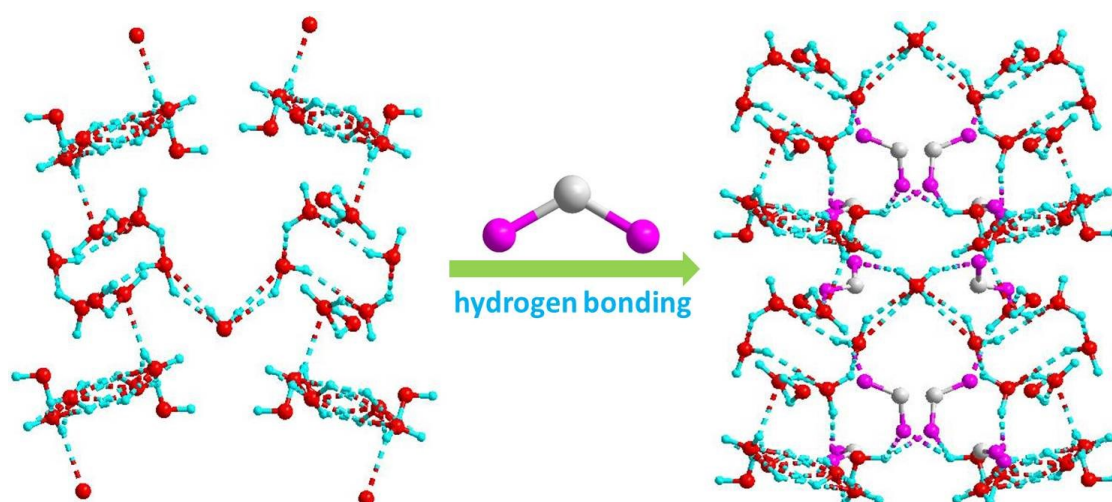

Fig. S2 The infinite water cluster of  $(\text{H}_2\text{O})_n$  (left) and abundant hydrogen bond network formed by  $(\text{H}_2\text{O})_n$  and  $-\text{COO}^-$  groups (right), where the carboxylic acid oxygen atoms are labeled as pink for clearly.

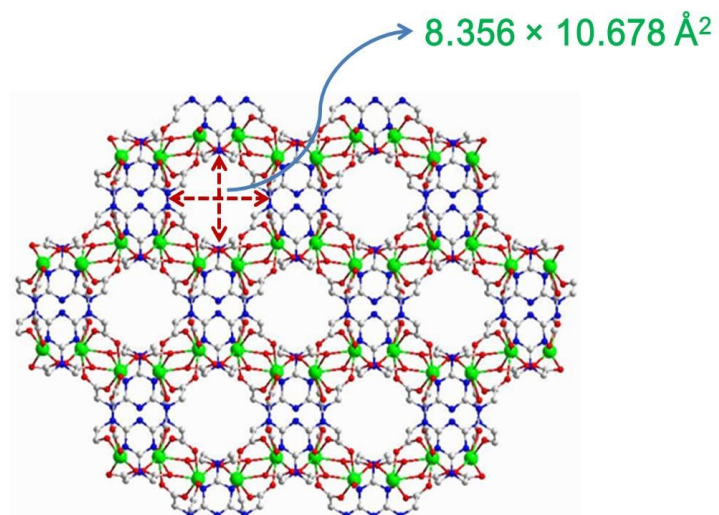

**Fig. S3** The cavities with regular size of  $8.356 \times 10.678 \text{ \AA}^2$  are left in the three-dimensional network structure of **1**.

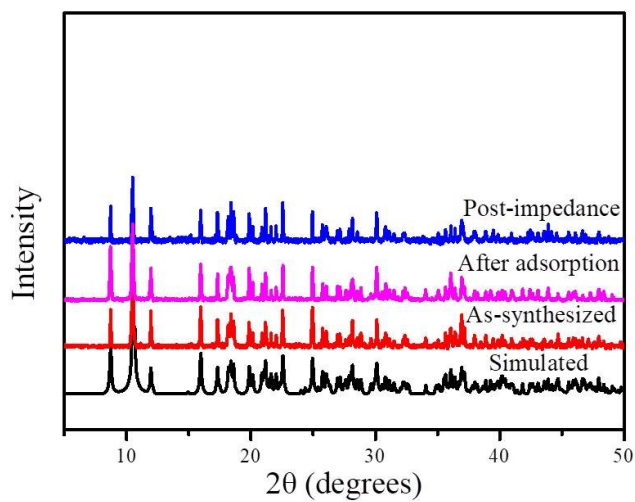

**Fig. S4** The XRD patterns of **1** under different experimental conditions.

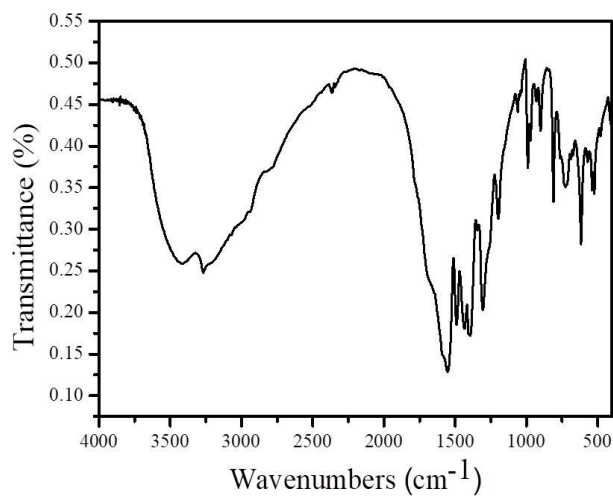

**Fig. S5** The IR spectrum of **1**.

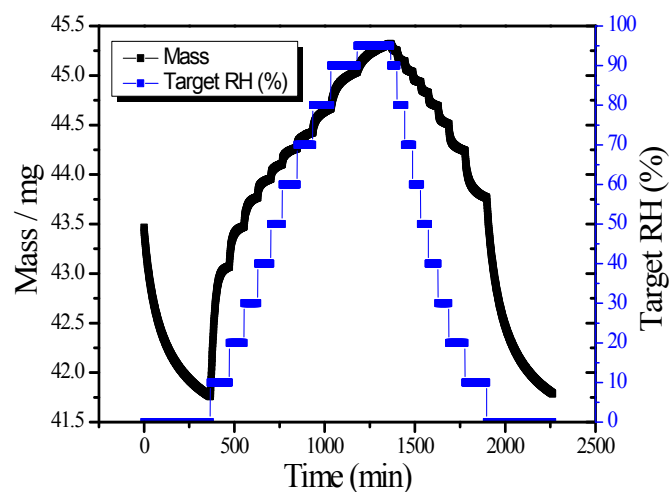

Fig. S6 The change curves of mass and RH with time for the complex **1**.

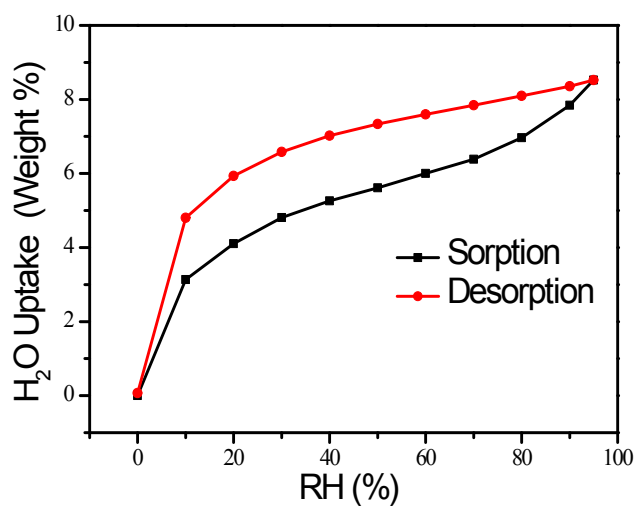

Fig. S7 Water adsorption–desorption isotherms (25 °C) of **1** measured by DVS Intrinsic Plus.

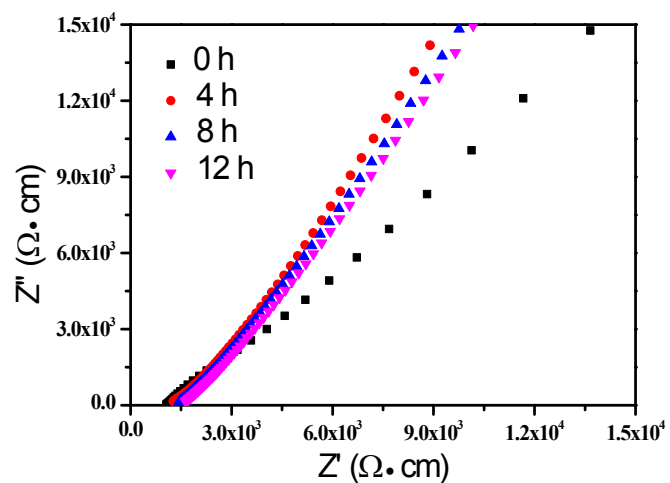

Fig. S8 The Nyquist plots for proton conductivity of **1** (343 K and 98% RH) at 0h, 4h, 8h and 12h.

Table S1 Hydrogen-bond geometry (Å, °) for **1**.

| D-H...A | D-H | H...A | D...A | D-H...A |
|---------|-----|-------|-------|---------|
|---------|-----|-------|-------|---------|

|                                                              |          |          |          |          |
|--------------------------------------------------------------|----------|----------|----------|----------|
| O1-H1A...O7 <sup>i</sup>                                     | 0.876(6) | 2.320(5) | 2.713(7) | 107.4(4) |
| O1-H1B...O9 <sup>ii</sup>                                    | 0.876(5) | 2.044(6) | 2.701(8) | 131.1(4) |
| O9 <sup>ii</sup> -H9A <sup>ii</sup> ...O5 <sup>ii</sup>      | 0.871(6) | 1.941(5) | 2.737(8) | 151.3(4) |
| O9 <sup>ii</sup> -H9B <sup>ii</sup> ...O10 <sup>iii</sup>    | 0.871(7) | 2.084(7) | 2.863(9) | 148.5(5) |
| O13 <sup>i</sup> -H13A <sup>i</sup> ...O13A <sup>i</sup>     | 0.870(2) | 1.642(2) | 0.818(3) | 13.0(2)  |
| O13 <sup>i</sup> -H13B <sup>i</sup> ...O9 <sup>ii</sup>      | 0.871(2) | 1.990(5) | 2.554(2) | 121.4(1) |
| O13A <sup>i</sup> -H13C <sup>i</sup> ...O13 <sup>i</sup>     | 0.870(2) | 1.522(2) | 0.818(3) | 24.8(1)  |
| O13A <sup>i</sup> -H13D <sup>i</sup> ...O13 <sup>i</sup>     | 0.869(2) | 1.306(2) | 0.818(3) | 37.9(2)  |
| O13A <sup>i</sup> -H13D <sup>i</sup> ...O13 <sup>iv</sup>    | 0.869(2) | 2.507(2) | 2.888(3) | 107.3(1) |
| O13A <sup>i</sup> -H13D <sup>i</sup> ...O13A <sup>iv</sup>   | 0.869(2) | 1.742(2) | 2.193(3) | 109.6(1) |
| O10 <sup>iii</sup> -H10A <sup>iii</sup> ...O4 <sup>iii</sup> | 0.870(7) | 2.219(5) | 3.031(8) | 155.4(5) |
| O10 <sup>iii</sup> -H10B <sup>iii</sup> ...O12 <sup>v</sup>  | 0.870(7) | 2.244(7) | 2.726(9) | 114.9(5) |
| O12 <sup>v</sup> -H12A <sup>v</sup> ...O11 <sup>vi</sup>     | 0.868(7) | 2.033(6) | 2.786(1) | 144.4(5) |
| O12 <sup>v</sup> -H12B <sup>v</sup> ...O10 <sup>vii</sup>    | 0.869(8) | 2.363(7) | 3.106(1) | 143.7(5) |
| O11 <sup>vi</sup> -H11A <sup>vi</sup> ...O12 <sup>vi</sup>   | 0.870(6) | 2.075(7) | 2.786(1) | 138.3(2) |
| O11 <sup>vi</sup> -H11B <sup>v</sup> ...O8 <sup>viii</sup>   | 0.869(6) | 1.999(5) | 2.804(6) | 153.7(1) |
| O2 <sup>ix</sup> -H2A <sup>ix</sup> ...O13 <sup>vii</sup>    | 0.877(5) | 2.353(2) | 2.813(2) | 112.9(6) |
| O2 <sup>ix</sup> -H2A <sup>ix</sup> ...O13A <sup>vii</sup>   | 0.877(5) | 2.399(2) | 2.730(2) | 102.7(6) |
| O2 <sup>ix</sup> -H2B <sup>ix</sup> ...O6 <sup>ii</sup>      | 0.876(6) | 2.000(5) | 2.684(7) | 134.1(4) |
| O2 <sup>ix</sup> -H2B <sup>ix</sup> ...O6 <sup>i</sup>       | 0.876(6) | 2.418(5) | 2.810(7) | 107.6(4) |

Symmetry codes (i: 0.5+x, 1.5-y, -0.5+z; ii: 1.5-x, 1.5-y, 1-z; iii: 1+x, y, z; iv: 2-x, y, 1.5-z; v: 2.5-x, 0.5+y, 1.5-z; vi: 0.5+x, 0.5+y, z; vii: 2-x, 2-y, 1-z; viii: 1.5+x, 0.5+y, z; ix: x, 2-y, -0.5+z).

**Table S2** Crystallographic data and refinement parameters of **1**

| <b>1</b>          |                                                                                |
|-------------------|--------------------------------------------------------------------------------|
| CCDC              | 2036641                                                                        |
| Empirical formula | C <sub>15</sub> H <sub>38</sub> Eu <sub>2</sub> N <sub>6</sub> O <sub>25</sub> |
| Formula weigh     | 1006.43                                                                        |
| Temperature/K     | 173                                                                            |
| Crystal system    | monoclinic                                                                     |
| Space group       | <i>C</i> 2/ <i>c</i>                                                           |
| a/Å               | 12.7130(11)                                                                    |
| b/Å               | 16.7745(15)                                                                    |
| c/Å               | 14.7977(13)                                                                    |
| α/°               | 90                                                                             |
| β/°               | 91.265(4)                                                                      |
| γ/°               | 90                                                                             |
| V/Å <sup>3</sup>  | 3154.9(5)                                                                      |
| Z                 | 4                                                                              |

|                                                                               |              |
|-------------------------------------------------------------------------------|--------------|
| $D_{\text{calc}}/\text{g cm}^{-3}$                                            | 2.119        |
| $\mu/\text{mm}^{-1}$                                                          | 4.048        |
| F(000)                                                                        | 1984.0       |
| h, k, l max                                                                   | 15, 20, 17   |
| No. of parameters                                                             | 243          |
| S                                                                             | 0.998        |
| $R_1, wR_2 [I > 2\sigma(I)]$                                                  | 0.0392, 0.07 |
| $\Delta\rho_{\text{max}}$ and $\Delta\rho_{\text{min}}, \text{e } \text{\AA}$ | 0.745, 0.566 |

**Table S3** Selected bond lengths ( $\text{\AA}$ ) of **1**.

| <b>1</b>             |          |                       |          |
|----------------------|----------|-----------------------|----------|
| Eu1-O1               | 2.472(5) | Eu1-O2                | 2.424(5) |
| Eu1-O3 <sup>i</sup>  | 2.606(5) | Eu1-O4 <sup>i</sup>   | 2.478(6) |
| Eu1-O3               | 2.374(5) | Eu1-O5 <sup>ii</sup>  | 2.524(5) |
| Eu1-O6 <sup>ii</sup> | 2.461(5) | Eu1-O7 <sup>iii</sup> | 2.401(5) |
| Eu1-O8 <sup>iv</sup> | 2.379(5) |                       |          |

Symmetry codes (i: 1.5-x, 1.5-y, 1-z; ii: 0.5+x, 0.5+y, z; iii: 0.5+x, 1.5-y, -0.5+z; iv: 1-x, y, 1.5-z)

**Table S4** The resistance (R) and conductivity ( $\sigma$ ) of **1** under different temperature and 98% RH. The values of pellet dimensions including sample thickness ( $l$ ) and diameter are 500  $\mu\text{m}$  and 2 mm, respectively.

| Temperature (K) | R ( $\Omega$ ) | $\sigma$ (S/cm)       |
|-----------------|----------------|-----------------------|
| 293             | 11892.8        | $1.34 \times 10^{-4}$ |
| 298             | 9785.52        | $1.63 \times 10^{-4}$ |
| 303             | 8025.75        | $1.98 \times 10^{-4}$ |
| 308             | 6321.61        | $2.52 \times 10^{-4}$ |
| 313             | 5016.63        | $3.17 \times 10^{-4}$ |
| 318             | 3914.39        | $4.07 \times 10^{-4}$ |
| 323             | 3013.24        | $5.28 \times 10^{-4}$ |
| 333             | 1980.25        | $8.04 \times 10^{-4}$ |
| 343             | 1074.69        | $1.48 \times 10^{-3}$ |
| 353             | 455.31         | $3.50 \times 10^{-3}$ |

**Table S5** The resistance (R) and conductivity ( $\sigma$ ) of **1** under different relative humidity and 298 K.

| RH (%) | R ( $\Omega$ ) | $\sigma$ (S/cm)       |
|--------|----------------|-----------------------|
| 60     | 112098.428     | $1.42 \times 10^{-5}$ |
| 70     | 66985.6459     | $2.38 \times 10^{-5}$ |
| 80     | 32516.53       | $4.9 \times 10^{-5}$  |
| 90     | 21360.46       | $7.45 \times 10^{-5}$ |
| 98     | 9785.52        | $1.63 \times 10^{-4}$ |

**Table S6** The resistance (R) and conductivity ( $\sigma$ ) of **1** (343 K and 98% RH) under different time.

| Time (h) | R ( $\Omega$ )     | $\sigma$ (S/cm)       |
|----------|--------------------|-----------------------|
| 0        | $1.07 \times 10^3$ | $1.48 \times 10^{-3}$ |
| 4        | $1.12 \times 10^3$ | $1.43 \times 10^{-3}$ |
| 8        | $1.38 \times 10^3$ | $1.16 \times 10^{-3}$ |
| 12       | $1.52 \times 10^3$ | $1.05 \times 10^{-3}$ |

## References

- 1 P. de Hoog, P. Gamez, W. L. Driessen and J. Reedijk, *Tetrahedron Lett.*, 2002, **43**, 6783.
- 2 M. Er, R. Ustabaş, U. Coruh, K. Sancak, E. Vázquez-López, *Int. J. Mol. Sci.*, 2008, **9**, 1000.
- 3 G. M. Sheldrick, SADABS: Program for Empirical Absorption Correction of Area Detector Data, University of Göttingen, Germany, 1996.
- 4 G. M. Sheldrick, SHELX2013, Programs for Crystal Structure Analysis; Institut für Anorganische Chemie der Universität: Göttingen, Germany, 1998.
- 5 *winDETA*, Novocontrol GmbH: Hundsangen, Germany, 1995.
